# Supplementary material for: Ultra-deep oxidative desulfurization of fuel with H2O2catalyzed by molybdenum oxide supported on alumina modified by Ca2+
Source: Royal Society of Chemistry journal article supplement (doi:10.1039/c7ra08900g), 2017-01-01
Supplement: c7ra08900g1.pdf [file c7ra08900g1.pdf]

## Supporting Information for:

### Ultra-deep oxidative desulfurization of fuel with H<sub>2</sub>O<sub>2</sub> catalyzed by molybdenum oxide supported on alumina modified by Ca<sup>2+</sup>

Wei Jin, Yongsheng Tian, Guanghui Wang, Danlin Zeng, Qian Xu, Jiawei Cui

*Hubei Key Laboratory of Coal Conversion and New Carbon Material, School of Chemistry and Chemical Engineering, Wuhan University of Science and Technology, Wuhan 430081, Hubei, China*

#### Contents

1. **Fig.1.** FT-IR spectra of MoO<sub>3</sub> (a), Al<sub>2</sub>O<sub>3</sub> (b) and Ca/MoO<sub>3</sub>/Al<sub>2</sub>O<sub>3</sub> (c).
2. **Fig.2.** X-ray diffractions of ammonium molybdate (a), Al<sub>2</sub>O<sub>3</sub> (b) and Ca/MoO<sub>3</sub>/Al<sub>2</sub>O<sub>3</sub> (c).
3. **Fig.3.** Pore structure parameters of Ca/MoO<sub>3</sub>/Al<sub>2</sub>O<sub>3</sub>. (a) Adsorption desorption isotherm; (b) Pore size distribution.
4. **Fig.4.** XPS spectra of Ca/MoO<sub>3</sub>/Al<sub>2</sub>O<sub>3</sub>:(a) Survey, (b) Mo 3d, (c) Ca 2p and MoO<sub>3</sub>/Al<sub>2</sub>O<sub>3</sub>:(a) Survey, (d) Mo 3d.

Fig. 1 shows the FT-IR spectra of MoO<sub>3</sub> (a), Al<sub>2</sub>O<sub>3</sub> (b), and Ca/MoO<sub>3</sub>/Al<sub>2</sub>O<sub>3</sub> (c). The characteristic peaks observed in the FT-IR spectrum of MoO<sub>3</sub> at 988, 878 and 634 cm<sup>-1</sup> were attributed to the fundamental vibrational modes of Mo=O.<sup>1</sup> The dominion band at 821 cm<sup>-1</sup> is associated with the vibration of Mo-O-Mo bridging

bonds.<sup>1</sup> For the Ca/MoO<sub>3</sub>/Al<sub>2</sub>O<sub>3</sub> (c), owing to the overlap of the characteristic peaks of MoO<sub>3</sub> with that of the Al<sub>2</sub>O<sub>3</sub> appeared at 740 and 640 cm<sup>-1</sup> (Al-O bands),<sup>2</sup> the bands of MoO<sub>3</sub> were not observed after the immobilization of MoO<sub>3</sub> on the support. It suggested that MoO<sub>3</sub> was highly dispersed on the Al<sub>2</sub>O<sub>3</sub> support.

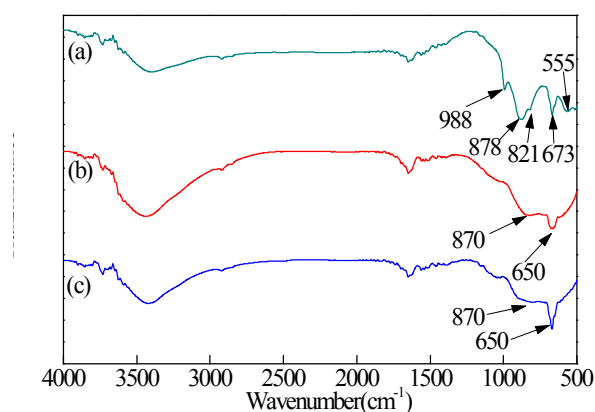

**Fig.1.** FT-IR spectra of MoO<sub>3</sub> (a), Al<sub>2</sub>O<sub>3</sub> (b) and Ca/MoO<sub>3</sub>/Al<sub>2</sub>O<sub>3</sub> (c).

Fig. 2 shows the powder X-ray diffractions of ammonium molybdate(a), Al<sub>2</sub>O<sub>3</sub>(b), and Ca/MoO<sub>3</sub>/Al<sub>2</sub>O<sub>3</sub>(c). As shown in Fig. 2, The characteristic peaks of ammonium molybdate at  $2\theta = 13.0^\circ$ ,  $23.2^\circ$ ,  $25.6^\circ$ ,  $27.2^\circ$ ,  $34.3^\circ$ ,  $39.1^\circ$ ,  $46.5^\circ$ ,  $50.1^\circ$ ,  $53.7^\circ$  and  $60.4^\circ$  emerged, which belonged to the characteristic peaks of the MoO<sub>3</sub> unit.<sup>3</sup> For Ca/MoO<sub>3</sub>/Al<sub>2</sub>O<sub>3</sub>, no crystal diffraction peaks of MoO<sub>3</sub> were found, which indicates that MoO<sub>3</sub> clusters are highly dispersed on the surface of Al<sub>2</sub>O<sub>3</sub>. XRD analysis confirms that the catalyst Ca/MoO<sub>3</sub>/Al<sub>2</sub>O<sub>3</sub> structure is an amorphous phase because of no characteristic diffraction peaks.

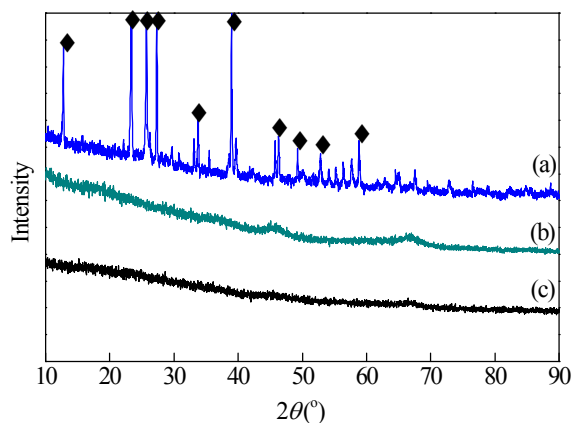

**Fig.2.** X-ray diffractions of ammonium molybdate (a),  $\text{Al}_2\text{O}_3$  (b) and  $\text{Ca}/\text{MoO}_3/\text{Al}_2\text{O}_3$  (c).

The  $\text{N}_2$  adsorption-desorption isotherm (a) and pore size distribution (b) of  $\text{Ca}/\text{MoO}_3/\text{Al}_2\text{O}_3$  are shown in Fig.3. Based on the taxonomy, the adsorption isotherm of  $\text{Ca}/\text{MoO}_3/\text{Al}_2\text{O}_3$  exhibits type IV isotherms using IUPAC, revealing that the catalysts are characteristic of mesoporous materials.<sup>4</sup> The adsorption isotherm data were processed by the BET and BJH theoretical models. The pore size distribution of  $\text{Ca}/\text{MoO}_3/\text{Al}_2\text{O}_3$  was concentrated at the average pore diameter of 8.00 nm, the specific surface area was  $151.09 \text{ m}^2/\text{g}$ , and the total pore volume was  $0.302 \text{ cm}^3/\text{g}$ . The abundant pores and high pore volume would be favorable to the oxidation reaction because it would assist the adsorption of 4,6-DMDBT, DBT and BT on the catalyst surface.

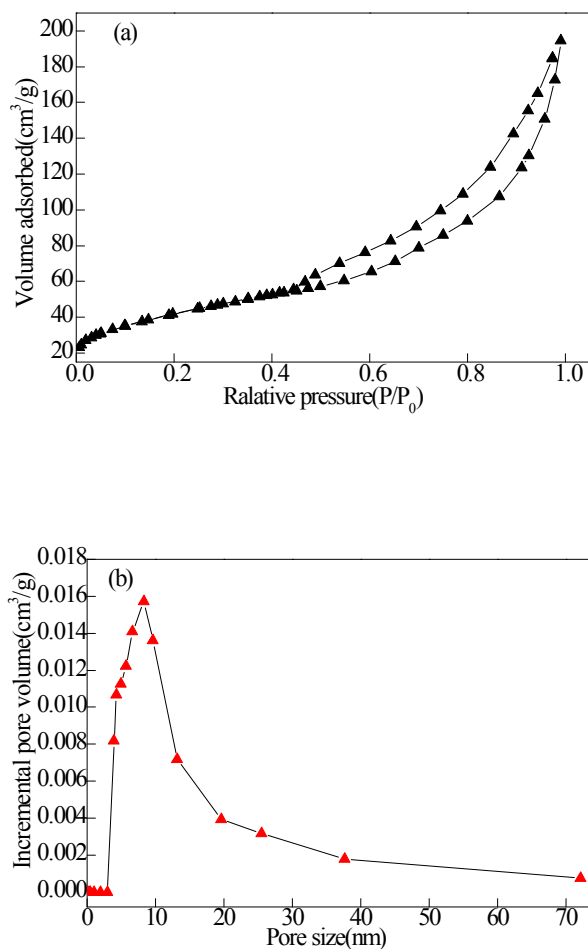

**Fig.3.** Pore structure parameters of Ca/MoO<sub>3</sub>/Al<sub>2</sub>O<sub>3</sub>. (a) Adsorption-desorption isotherm; (b) Pore size distribution.

Fig.4 shows the XPS spectra of Ca/MoO<sub>3</sub>/Al<sub>2</sub>O<sub>3</sub> and MoO<sub>3</sub>/Al<sub>2</sub>O<sub>3</sub>. From Fig. 4 (a), the comparison showed that the XPS spectra of Ca/MoO<sub>3</sub>/Al<sub>2</sub>O<sub>3</sub> had gained a new Ca 2*p* characteristic peak than MoO<sub>3</sub>/Al<sub>2</sub>O<sub>3</sub>. It indicated that the presence of Ca in the catalyst Ca/MoO<sub>3</sub>/Al<sub>2</sub>O<sub>3</sub>. Fig. 4(b) and (d) present the Mo 3*d* spectrum of Ca/MoO<sub>3</sub>/Al<sub>2</sub>O<sub>3</sub> and MoO<sub>3</sub>/Al<sub>2</sub>O<sub>3</sub>. The appearance of two signals at 233.7 eV (233.0 eV) and 236.9 eV (236.2 eV) for Mo 3*d*<sub>5/2</sub> and Mo 3*d*<sub>3/2</sub> respectively. Based on the researches of García-Gutiérrez,<sup>5</sup> the absorption peak at 232.7 eV corresponded to Mo

<sup>6+</sup>, so it shall serve to illustrate the valence of molybdenum element in the catalysts are +6. The comparison of Fig. 4(b) and (d) showed the binding energy (233.7 eV) of the Mo 3d<sub>5/2</sub> on the Ca/MoO<sub>3</sub>/Al<sub>2</sub>O<sub>3</sub> catalyst was increased by 0.7 eV with MoO<sub>3</sub>/Al<sub>2</sub>O<sub>3</sub> (233.0 eV). The result indicated that the electron cloud density of Mo atoms in the Mo=O bands was increased by Ca-doping, which was beneficial to the good association of H<sub>2</sub>O<sub>2</sub>, and thereby increase the activity of desulfurization. Fig. 4 (c) presents the Ca 2p spectrum of Ca/MoO<sub>3</sub>/Al<sub>2</sub>O<sub>3</sub>. The appearance of two signals at 347.8 eV and 350.9 eV for Ca 2p<sub>3/2</sub> and Ca 2p<sub>1/2</sub> respectively, and these binding energy values corresponded to Ca<sup>2+</sup>.<sup>6</sup>

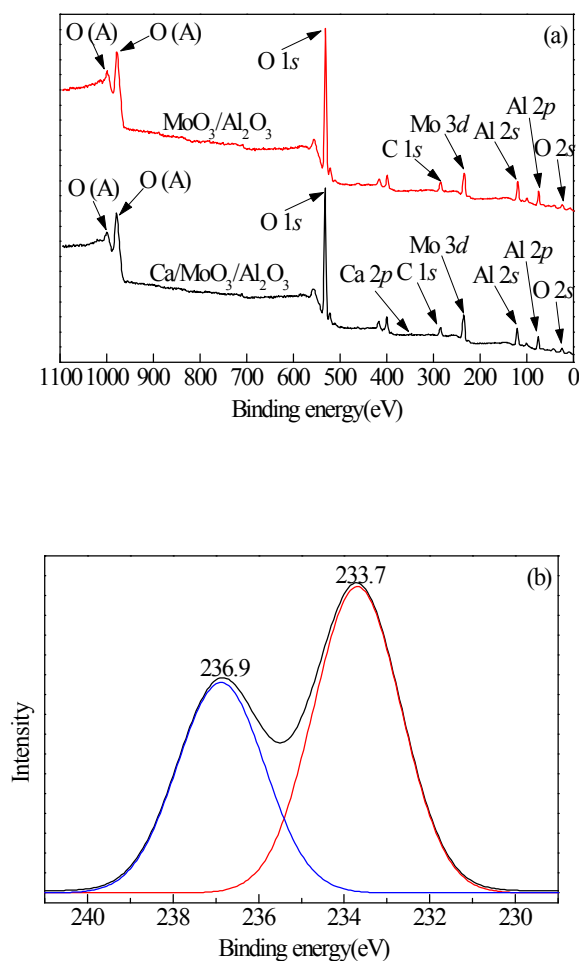

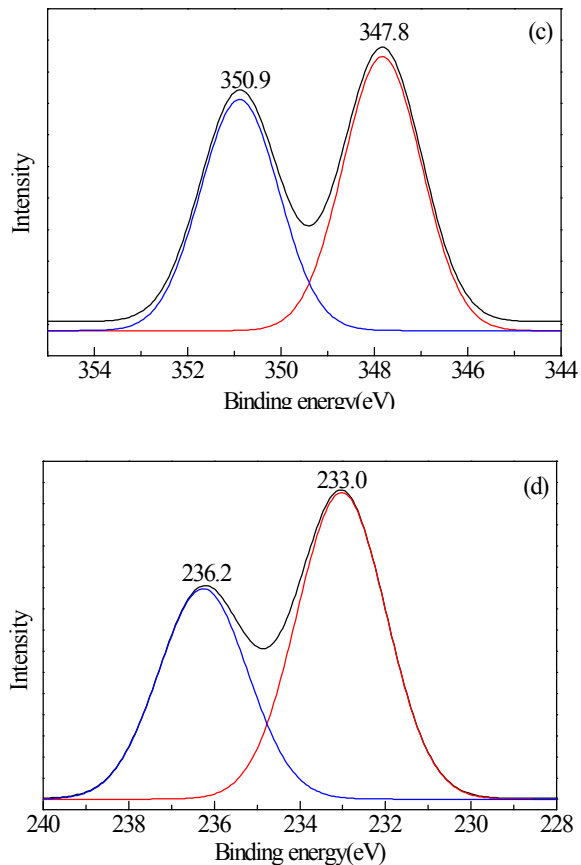

**Fig.4.** XPS spectra of Ca/MoO<sub>3</sub>/Al<sub>2</sub>O<sub>3</sub>:(a) Survey, (b) Mo 3d, (c) Ca 2p and MoO<sub>3</sub>/Al<sub>2</sub>O<sub>3</sub>:(a) Survey, (d) Mo 3d.

#### References

- [1] Krishna A G; Ravikumar R V S S N; Kumar T V; et al. Materials Today Proceedings, **2016**, 3(1):54-63.
- [2] Pavlenko V I; Cherkashina N I; Yastrebinskaya A V; et al. World Applied Sciences Journal, **2013**, 25(12):1740-1746.
- [3] Du K; Wei R H; Bai Y N; et al. Advanced Materials Research, **2012**, 554-556:494-497.
- [4] Sing K S W. Pure & Applied Chemistry, **1985**, 57(4):603--619.
- [5] García-Gutiérrez J L; Fuentes G A; Hernández-Terán M E; et al. Applied

Catalysis A General, **2006**, 305(1):15-20.

[6] Eighmy T T; Kinner A E; Shaw E L; et al. Surface Science Spectra, **1999**,  
6(3):193-201.
